# Supplementary material
Source: PubMed Central journal article supplement (PMC4485918)

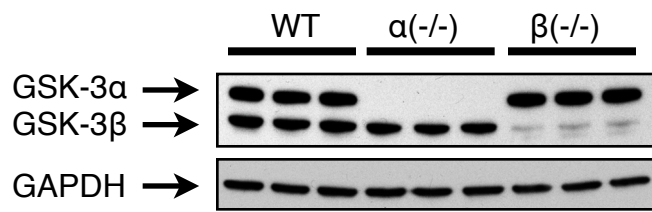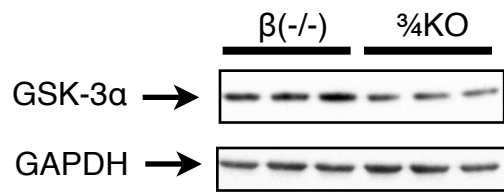

Supplement: NIHMS1542-supplement-Supp_fig_1.pdf [file NIHMS1542-supplement-Supp_fig_1.pdf]

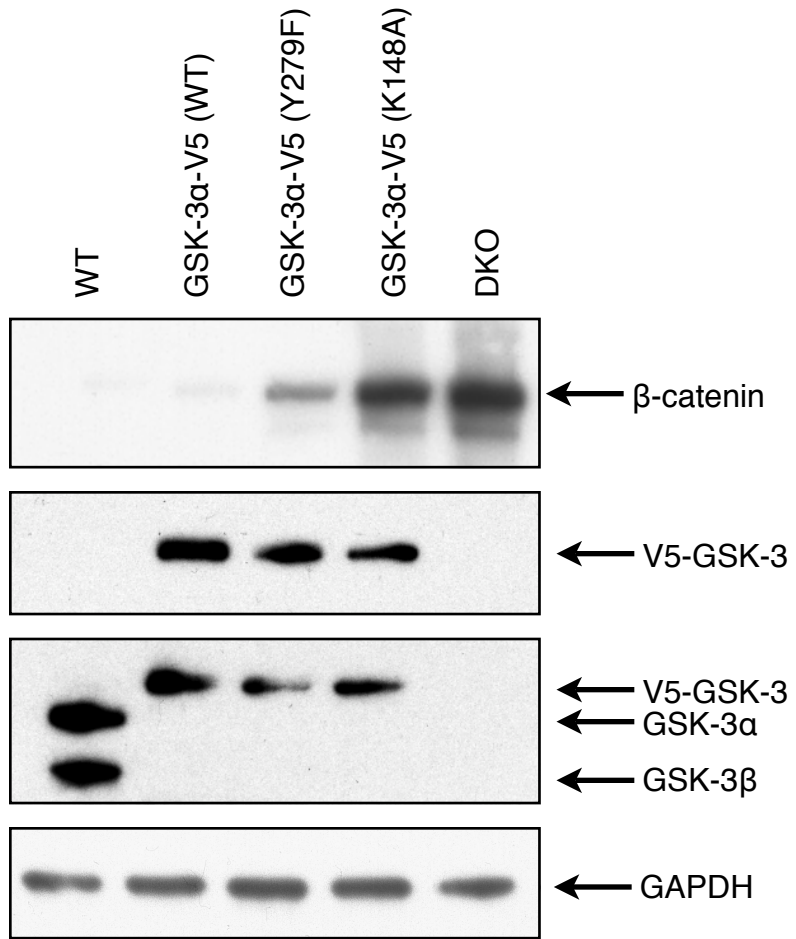

Supplement: NIHMS1542-supplement-Supp_fig_2.pdf [file NIHMS1542-supplement-Supp_fig_2.pdf]

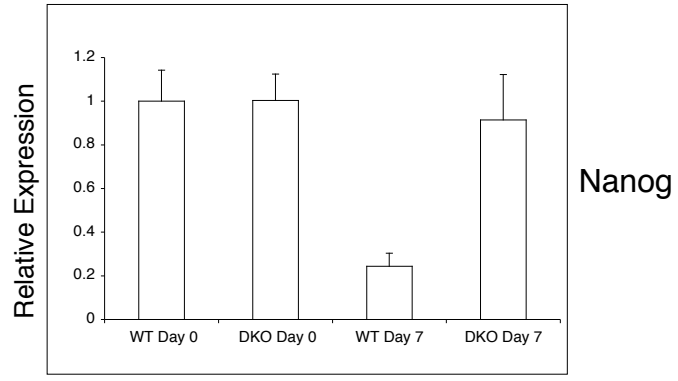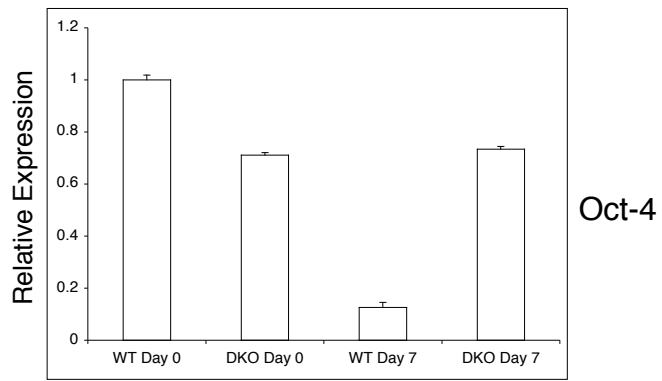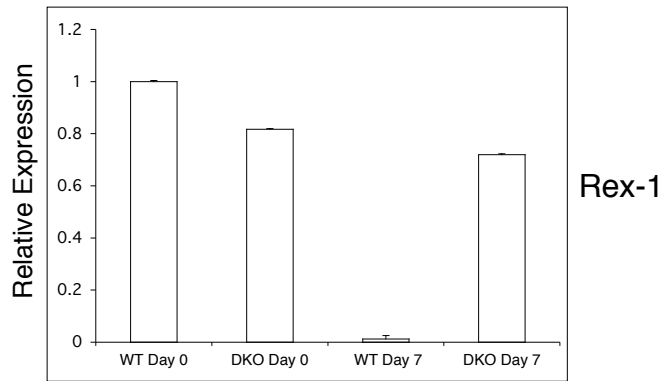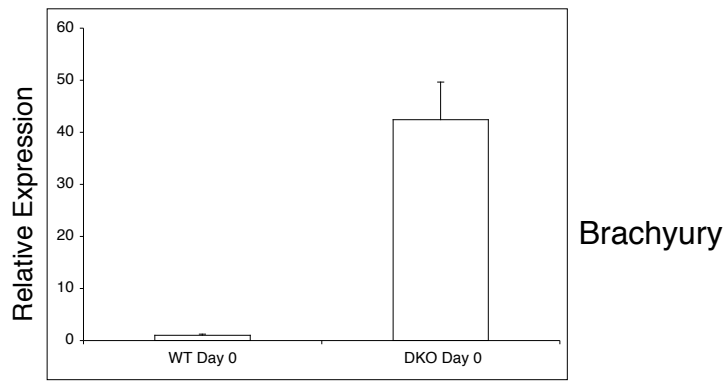

Supplement: NIHMS1542-supplement-Supp_fig_3.pdf [file NIHMS1542-supplement-Supp_fig_3.pdf]

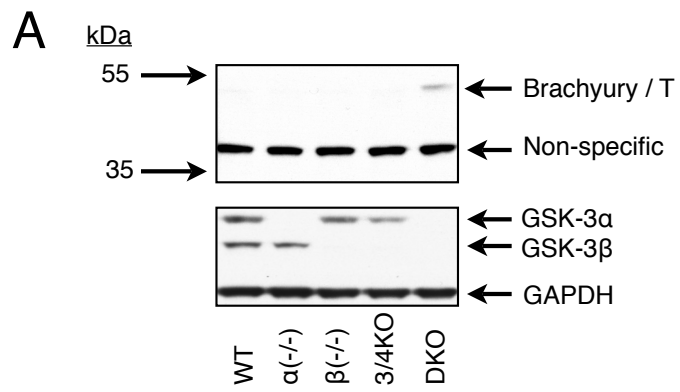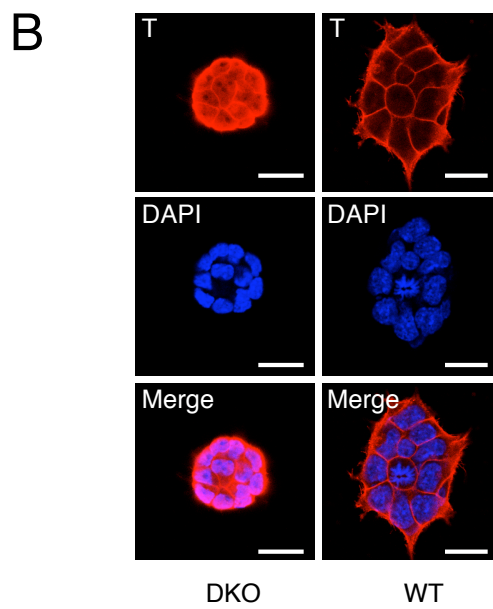

Supplement: NIHMS1542-supplement-Supp_fig_4.pdf [file NIHMS1542-supplement-Supp_fig_4.pdf]
